# Supplementary material for: A simple and rapid method to assay SARS-CoV-2 RNA based on a primer exchange reaction
Source: Royal Society of Chemistry journal article supplement (doi:10.1039/d2cc00488g), 2022-01-01
Supplement: d2cc00488g1.pdf [file d2cc00488g1.pdf]

1

## Supplementary Information

2

### A simple and rapid method to assay SARS-CoV-2 RNA based on primer exchange reaction

3

4 *Dayong Li,<sup>a</sup> Chengjie Duan,<sup>a</sup> Wenting Cheng,<sup>a</sup> Youjing gong,<sup>a</sup> Yanheng Yao,<sup>a</sup> Xiaoping*  
5 *Wang,<sup>\*c</sup> Zhongyun Wang<sup>\*d</sup> and Yang Xiang<sup>\*ab</sup>*

6

7 <sup>a</sup>State Key Laboratory of Pharmaceutical Biotechnology, School of Life Sciences,  
8 Nanjing University, Nanjing 210023, P. R. China

9 <sup>b</sup>State Key Laboratory of Natural and Biomimetic Drugs, Peking University, Beijing  
10 100191, P. R. China

11 <sup>c</sup>Department of Neurology, Tongren Hospital, Shanghai Jiao Tong University School  
12 of Medicine, Shanghai, 200336, P. R. China.

13 <sup>d</sup>Department of Anesthesiology, The First Affiliated Hospital of Nanjing Medical  
14 University, Nanjing 210029, P. R. China

15

16 \*Corresponding authors: xiangy@nju.edu.cn (Y. Xiang),

17 wangxp@ustc.edu (X. Wang), zywang1970@126.com (Z. Wang)

18

19

### 20 Reagents and materials

21 All the DNA oligonucleotides used in this work were obtained from Sangon  
22 Biotech. Co. Ltd. (Shanghai, China). The RNA sequence was synthesized by Genscript.  
23 Bio Tech (Nanjing China) (Table S1). The target RNA used in this study is the  
24 artificially synthesized conserved regions (ORF1ab fragment) of SARS-CoV-2 RNA

25 according to GenBank, SARS-CoV-2 NC\_045512. Large Fragment Bst DNA  
26 polymerase, 10x Bst Reaction Buffer (200mM Tris-HCl, 100mM KCl, 100mM  
27  $(\text{NH}_4)_2\text{SO}_4$ , 20mM  $\text{MgSO}_4$ , 1% Triton X-100) and 100mM  $\text{MgSO}_4$  were bought from  
28 Beyotime Biotech. (Shanghai China). dATP (100 mM), dTTP (100 mM), dCTP (100  
29 mM) were bought from Sangon Biotech. Co. Ltd. (Shanghai, China). RNase free water  
30 and RNase inhibitor were obtained from Takara Bio. (Dalian China). EnGen® Lba  
31 Cas12a (Cpf1) and 10×NEbuffer 2.1 were purchased from New England Biolabs  
32 (Beijing China). Ultra-pure water used in all experiments were purified by a Millipore  
33 purification system. Human serum was provided by the First Affiliated Hospital of  
34 Nanjing Medical University. Our research has been approved by the ethics committee  
35 of Nanjing Medical University and Nanjing University.

#### 36 **Native polyacrylamide gel electrophoresis**

37 The products of the PER cascade were verified by 12% non-denaturing gel  
38 electrophoresis. Specifically, we mixed 100nM target RNA with 100nM HP and  
39 500nM primers, and then added Bst DNA polymerase (0.4U/ $\mu\text{L}$ ) and 200 $\mu\text{M}$  dNTPs  
40 (A, T, C) to initiate the PER cascade. After two hours of reaction at 37°C, 10 $\mu\text{L}$  of the  
41 reaction solution was incubated with nucleic acid dye for 1 minute. Subsequently, the  
42 reaction solution was injected into the 12% PAGE. After running for 1 hour at 100V in  
43 1 × TBE buffer, the gel is finally scanned by the gel imaging system.

#### 44 **Detection protocol for SARS-COV-2 RNA**

45 Firstly, different concentrations of target RNA are added to the reaction solution  
46 with a total volume of 20 $\mu\text{L}$ , which contains 2nM HP and 10nM primers, 0.2U/ $\mu\text{L}$  Bst  
47 DNA polymerase, 4 $\mu\text{L}$  1mM dNTP (A, T, C), 2 $\mu\text{L}$  10×Bst reaction Buffer and  
48 3 $\mu\text{L}$  100mM  $\text{MgSO}_4$ . Then, the mixed solution was reacted at 37°C for 30 min. Next,  
49 2 $\mu\text{L}$  1 $\mu\text{M}$  cas12a, 2 $\mu\text{L}$  1 $\mu\text{M}$  CrRNA, 2 $\mu\text{L}$  10 $\mu\text{M}$  fluorescence reporter, 5 $\mu\text{L}$   
50 10×NEbuffer 2.1, and 19 $\mu\text{L}$  RNase free water were added into the solution to reach a  
51 total volume of 50 $\mu\text{L}$ . After reacting for 10 minutes at 37°C, the solution was finally

52 transferred to a black 96-well plate to measure its fluorescence value through Infinite  
 53 200Pro (Excitation 485nm, Emission 525 nm). When detecting target RNA in complex  
 54 biological samples of serum and saliva, except for the need to add RNase inhibitor to  
 55 prevent RNA degradation, the other steps are the same as above.

56

57 Table S1. DNA and RNA sequences used in this work

| Name                            | Sequence (5' to 3')                                                                                           |
|---------------------------------|---------------------------------------------------------------------------------------------------------------|
| HP (15bp)                       | ACTAAATTCAGGGCCTTTTGGCCCTGAATTTAGTAATA<br>AGAGATCAACTACTGAAGCATGGGTTCGCGGAGTTGA<br>TCTCTTATT-Inverted dT      |
| HP (17bp)                       | ACTAAATTCAGGGCCTTTTGGCCCTGAATTTAGTAATA<br>AGAGATCAACTCCACTGAAGCATGGGTTCGCGGAGTT<br>GATCTCTTATT-Inverted dT    |
| HP (19bp)                       | ACTAAATTCAGGGCCTTTTGGCCCTGAATTTAGTAATA<br>AGAGATCAACTCCGCACTGAAGCATGGGTTCGCGGAG<br>TTGATCTCTTATT-Inverted dT  |
| HP (21bp)                       | ACTAAATTCAGGGCCTTTTGGCCCTGAATTTAGTAATA<br>AGAGATCAACTCCGCGACTGAAGCATGGGTTCGCGGA<br>GTTGATCTCTTATT-Inverted dT |
| primer                          | ATCTC TTAT                                                                                                    |
| Target virus RNA                | UUUUUGAUCAACUCCGCGAACCCAUGCUUCAGUUUU<br>UU                                                                    |
| Single-base mismatched RNA (1M) | UUUUUGAUCAAGUCCGCGAACCCAUGCUUCAGUUUU<br>UU                                                                    |
| Two-base mismatched RNA (2M)    | UUUUUGAUCAAGUCCGCGAACCCAUGCUACAGUUUU<br>UU                                                                    |
| Three-base mismatched RNA (3M)  | UUUUUGAUCAAGUCCGCGAACCCAUGCUACAGUUUU<br>UU                                                                    |
| random DNA                      | TCAACATCAGTTGGCACCCATGTGATATCCTTTTT                                                                           |
| CrRNA                           | UAAUUUCUACUAAGUGUAGAUUGAAUUUAGUAAUA<br>AGAGAU                                                                 |
| excitation DNA                  | ATCTCTTATTACTAAATTCA                                                                                          |
| Fluorescence reporter (FQ)      | FAM-TTATT-BHQ1                                                                                                |

58 Red sequences represent conserved regions of the SARS-CoV-2 RNA.

59

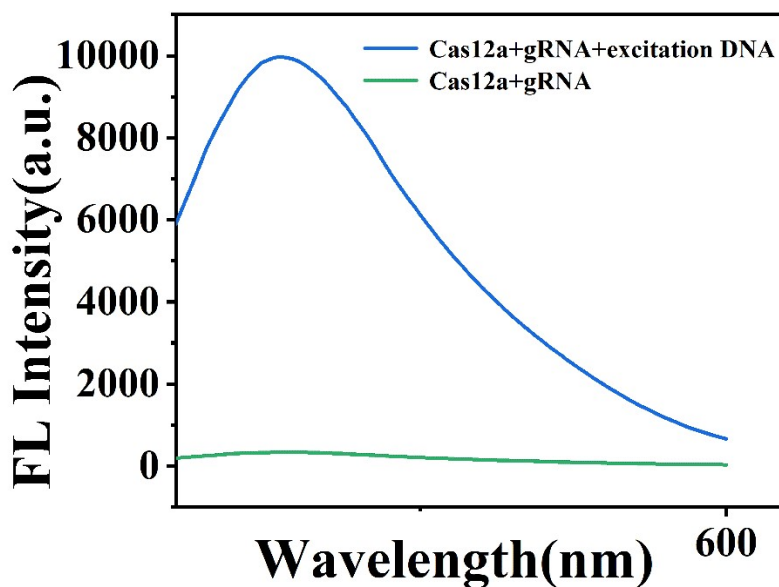

60

61 Fig. S1. The verification of trans-cleavage activity of cas12a protein (cpfl). Excitation  
 62 DNA is 5nM, cas12a is 40nM, CrRNA is 40nM and fluorescence reporter (FQ) is  
 63 400nM. Reaction time is 15min.

64

65

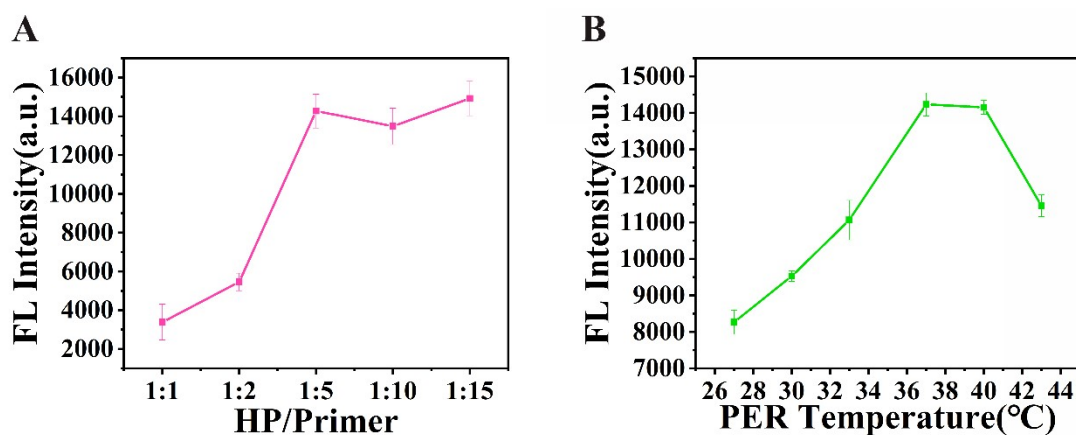

66

67 Fig. S2. Influence of the concentration ratio of HP to primer (A) and the PER  
 68 temperature (B) on the detection performance of the PER-based method. Target RNA  
 69 is 5nM and HP is 2nM.

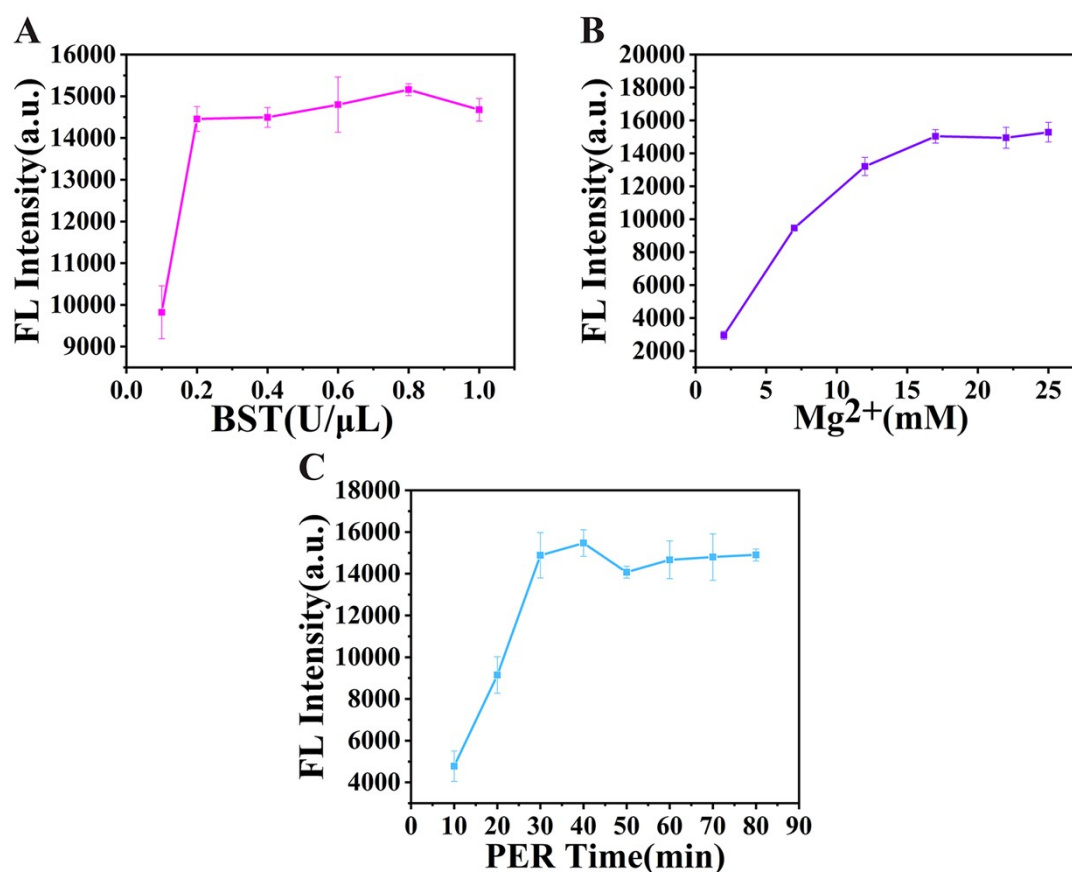

71 Fig. S3. Influence of the concentration of Bst DNA polymerase (A), Mg<sup>2+</sup> concentration  
 72 (B) and the PER reaction time (C) on the final detection performance of the biosensor.  
 73 Target RNA is 5nM, HP is 2nM and primer is 10nM.

74

75

76 Table S2. Comparison with some reported detection strategies for SARS-CoV-2 RNA.

| Signal output mode | LOD     | Detection time | Tested mutated SARS-CoV-2 | References |
|--------------------|---------|----------------|---------------------------|------------|
| Fluorescence       | 500 pM  | 60min          | No                        | [1]        |
| Colorimetry        | 140 pM  | 90min          | No                        | [2]        |
| Colorimetry        | 30.3 fM | 141min         | Yes                       | [3]        |
| Electrochemistry   | 26 fM   | 185min         | Yes                       | [4]        |
| Fluorescence       | 1.3 pM  | 40min          | Yes                       | This work  |

78 Table S3. Results for the detection of target RNA in 1xBst reaction buffer, 10% human  
79 serum and 10% saliva samples.

| <b>Sample number</b> | <b>Samples</b> | <b>Added(nM)</b> | <b>Found(nM)</b> | <b>Recovery (%)</b> | <b>RSD (%)<br/>n=3</b> |
|----------------------|----------------|------------------|------------------|---------------------|------------------------|
| 1                    | Buffer         | 0.2              | 0.214            | 107                 | 5.3                    |
| 2                    | Buffer         | 2                | 1.993            | 99.6                | 2.1                    |
| 3                    | 10% Serum      | 0.2              | 0.214            | 107                 | 3.4                    |
| 4                    | 10% Serum      | 2                | 2.04             | 102                 | 4.1                    |
| 5                    | 10% Saliva     | 0.2              | 0.207            | 103.5               | 3.9                    |
| 6                    | 10% Saliva     | 2                | 1.992            | 99.6                | 3.0                    |

80  
81  
82  
83  
84  
85  
86  
87  
88  
89  
90  
91  
92  
93  
94

95 **References**

- 96 1. M. Q. Liu, H. R. Li, Y. W. Jia, P. I. Mak and R. P. Martins, *Micromachines*, 2021, **12**, 11.  
97 2. J. Moon, H. J. Kwon, D. Yong, I. C. Lee, H. Kim, H. Kang, E. K. Lim, K. S. Lee, J. Jung, H. G.  
98 Park and T. Kang, *ACS Sens.*, 2020, **5**, 4017-4026.  
99 3. R. Liu, Y. S. Hu, Y. He, T. Lan and J. J. Zhang, *Chem. Sci.*, 2021, **12**, 9022-9030.  
100 4. Y. Peng, Y. H. Pan, Z. W. Sun, J. L. Li, Y. X. Yi, J. Yang and G. X. Li, *Biosens. Bioelectron.*,  
101 2021, **186**, 6.  
102
